# Supplementary material for: A feedback circuitry involving γ-actin, β-actin and nonmuscle myosin-2 A controls tight junction and apical cortex mechanics
Source: Springer Nature journal article supplement (doi:10.1038/s41467-025-57428-y), 2025-03-13
Supplement: MOESM1 [file 41467_2025_57428_MOESM1_ESM.pdf › 41467_2025_57428_MOESM1_ESM.pdf]

## **SUPPLEMENTARY INFORMATION**

### **Supplementary Figures**

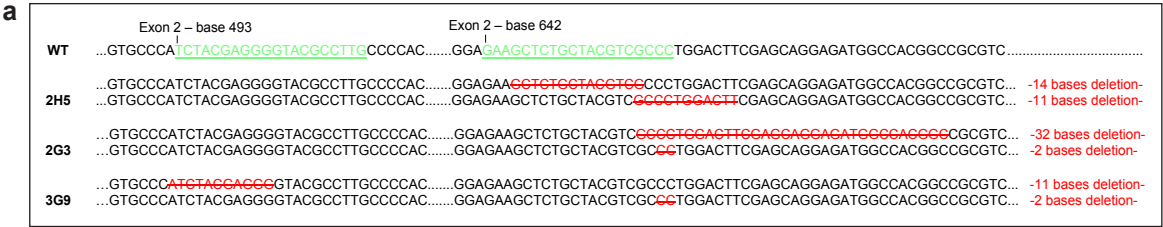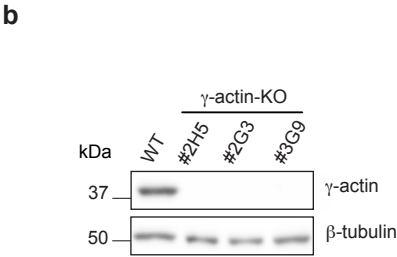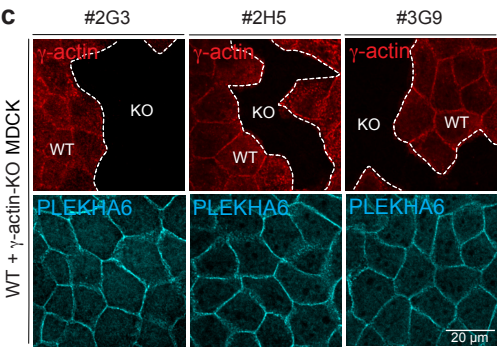

**Supplementary Figure 1. Generation of MDCK cells KO for  $\gamma$ -actin using Crispr/Cas9.**

(a-c) Validation of Crispr/Cas9-mediated deletion of  $\gamma$ -actin in WT MDCK background by genomic sequencing (a), IB (b) and IF microscopy (c) analysis.

For genomic sequencing, Crispr targets are coloured in green in WT sequence with their position in the exon, base deletions in the alleles of the KO clones obtained are highlighted by strikeout red. For IB analysis,  $\beta$ -tubulin is used as a loading control. For IF microscopy analysis, PLEKHA6 is used as junctional marker reference. Scale bar = 20  $\mu$ m.

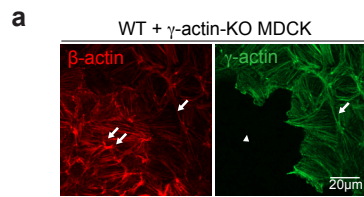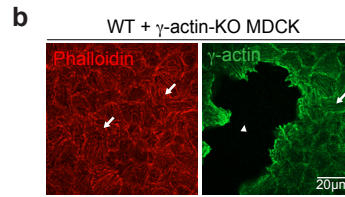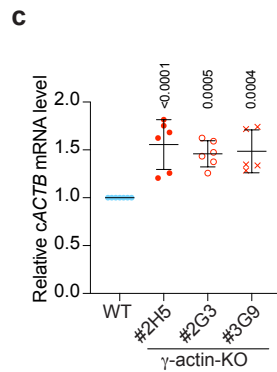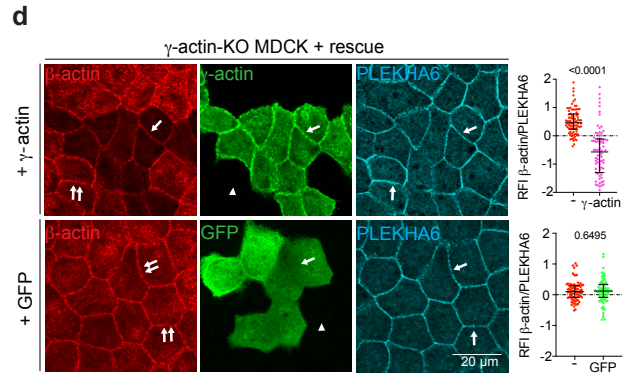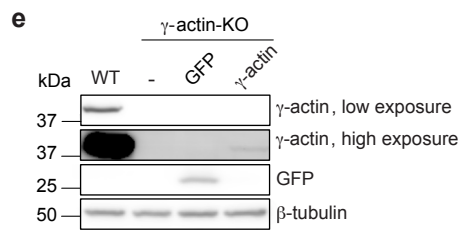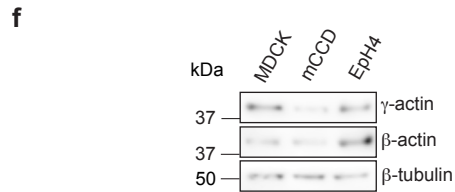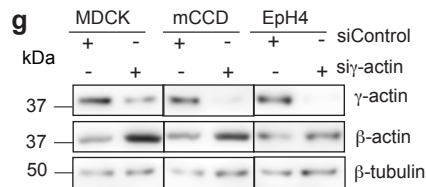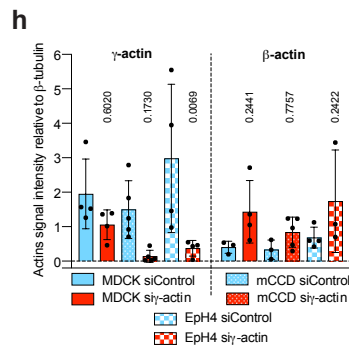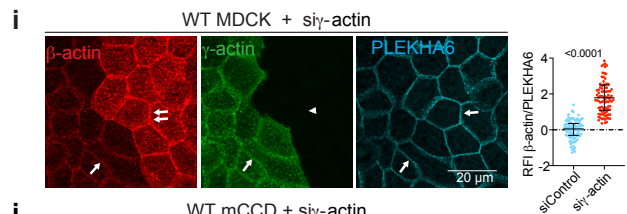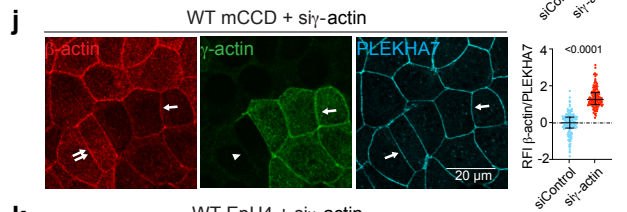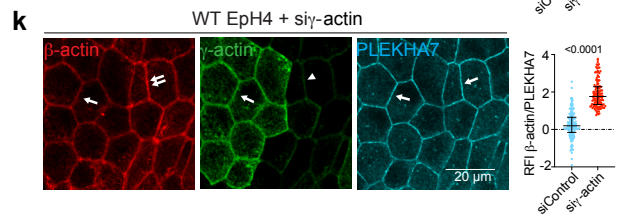

**Supplementary Figure 2. The KO of  $\gamma$ -actin specifically affects the mRNA and protein expression of  $\beta$ -actin in different epithelial cell types.**

(a-b) IF microscopy analysis of the localization of either  $\beta$ -actin (a) or phalloidin (b) in the basal region of mixed cultures of WT and  $\gamma$ -actin-KO MDCK.

(c) Relative mRNA levels of *cACTB* ( $\beta$ -actin) normalized by *cHPRT* in WT (blue dots) and  $\gamma$ -actin-KO (red dots) MDCK using RT-qPCR from 6 independent experiments. Dots shows replicates and bars represent mean  $\pm$  SD. Indicated p-values are obtained from a two-sided one-way Anova test.

(d) IF microscopy analysis and RFI quantifications of  $\beta$ -actin (red) at junctions in  $\gamma$ -actin-KO (red dots) rescued with either  $\gamma$ -actin (pink dots, top panels,  $\gamma$ -actin-KO: n=85,  $\gamma$ -actin-KO+ $\gamma$ -actin: n=79), or GFP (green dots, bottom panels,  $\gamma$ -actin-KO: n=80,  $\gamma$ -actin-KO+GFP: n=81) from 3 independent experiments.

(e) IB analysis of protein level of  $\gamma$ -actin and GFP in lysates of WT,  $\gamma$ -actin-KO, and  $\gamma$ -actin-KO rescued with either  $\gamma$ -actin or GFP. 2 exposure levels were used: low and high.

(f) IB analysis of protein level of  $\gamma$ -actin and  $\beta$ -actin in lysates of WT MDCK, mCCD and EpH4 from 3 independent experiments.

(g-h) IB analysis (g) and relative densitometric quantifications (h) of protein levels of  $\gamma$ -actin and  $\beta$ -actin in lysates of WT MDCK, mCCD and EpH4 treated with siControl (blue dots) or si $\gamma$ -actin (red dots) from 5 independent experiments.  $\beta$ -tubulin was used as a loading control. Indicated p-values are obtained from a two-sided one-way Anova test.

(i-k) IF microscopy analysis and RFI quantifications of  $\beta$ -actin (red) at junctions in WT (blue dots) MDCK (siControl: n=94, si $\gamma$ -actin: n=100) (i), mCCD (siControl: n=132, si $\gamma$ -actin: n=141) (j) or EpH4 (siControl: n=142, si $\gamma$ -actin: n=137) (k) upon  $\gamma$ -actin depletion (red dots) from 2-3 independent experiments.

(a-b, d, i-k) KO/KD/rescue cells were distinguished from WT  $\gamma$ -actin or GFP (green). Arrows indicate normal labelling (as in WT). Double-arrows indicate increased labelling for  $\beta$ -actin. Arrowheads indicate loss of  $\gamma$ -actin labelling in KO or KD cells. PLEKHA6 or PLEKHA7 are used as junctional markers (cyan). Scale bar = 20  $\mu$ m. Dots shows replicates and bars represent mean  $\pm$  SD. Indicated p-values are obtained from a two-sided unpaired Mann-Whitney test. Source data for this figure are provided as a Source Data file.

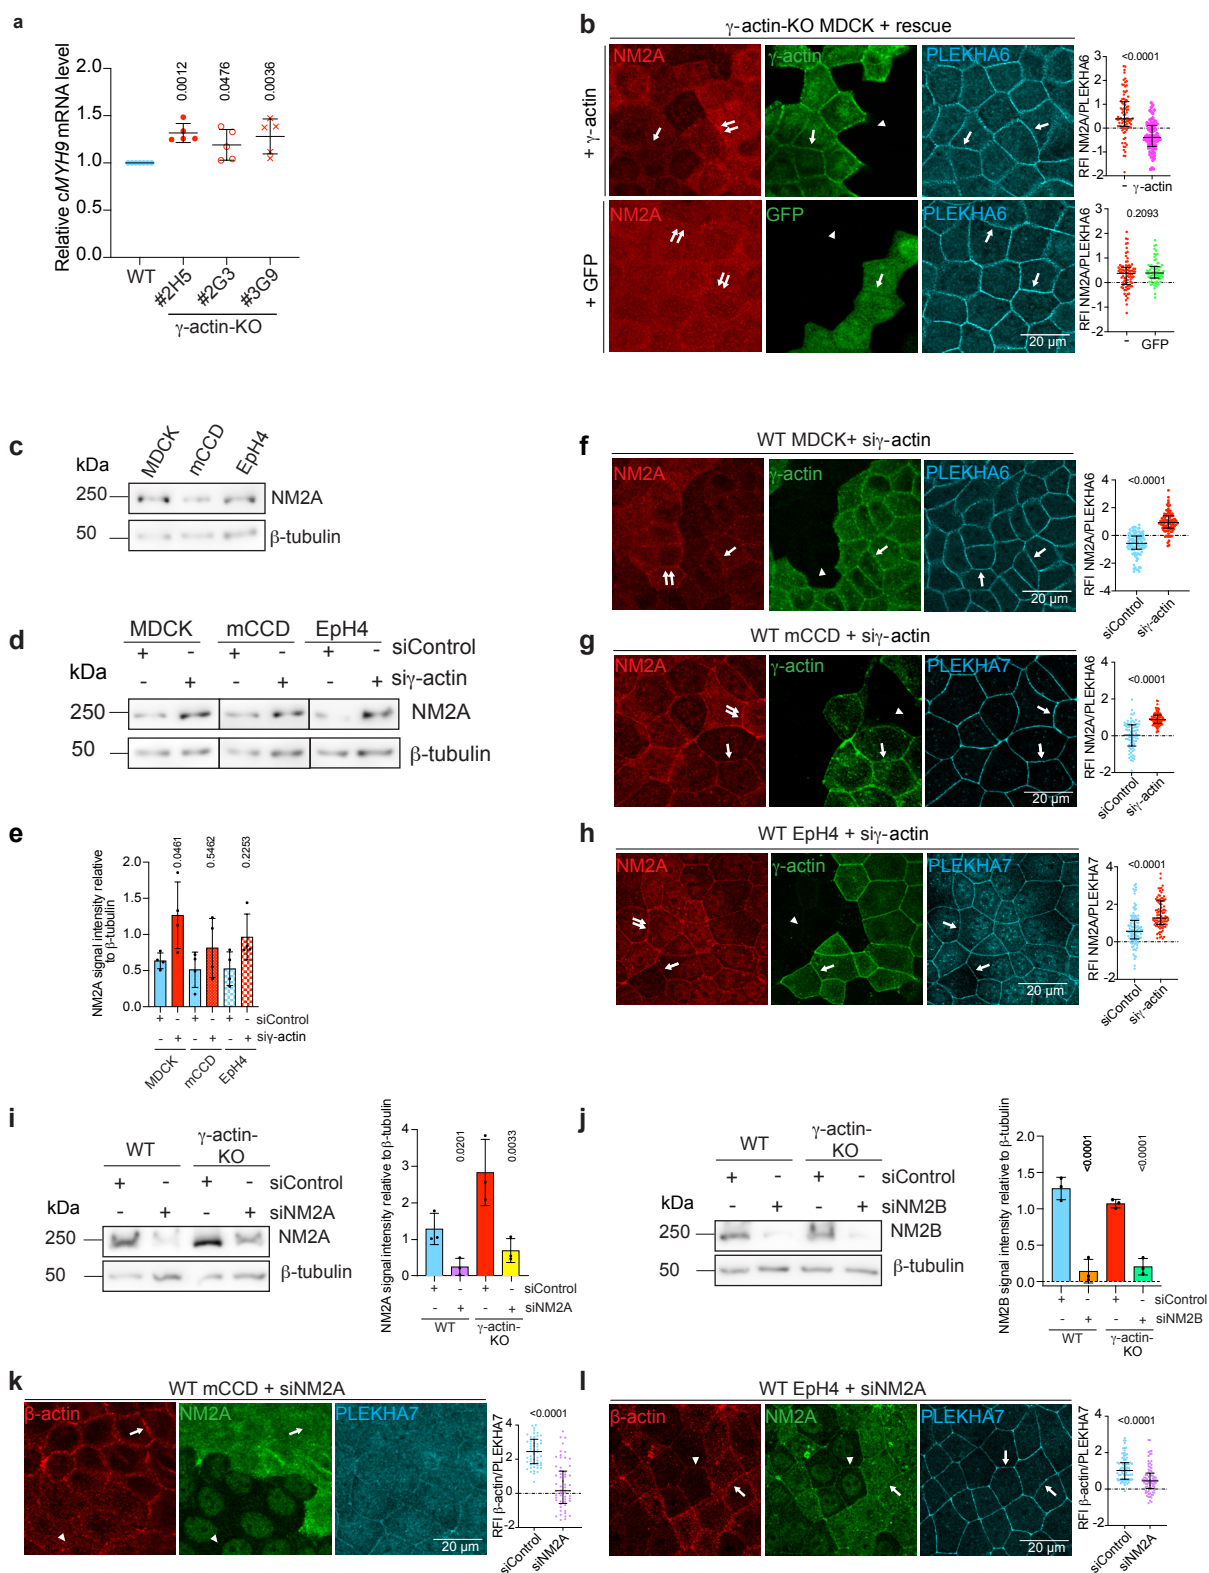

**Supplementary Figure 3. The KO of  $\gamma$ -actin specifically affects the mRNA and protein expression of NM2A in different epithelial cell types, and this in turn affects  $\beta$ -actin.**

(a) Relative mRNA levels of *cMYH9* (NM2A) normalized by *cHPRT* in WT (blue dots) and  $\gamma$ -actin-KO (red dots) MDCK using RT-qPCR from 5 independent experiments. Dots shows replicates and bars represent mean  $\pm$  SD. Indicated p-values are obtained from a two-sided one-way Anova test.

(b) IF microscopy analysis and RFI quantifications of NM2A (red) at junctions in  $\gamma$ -actin-KO (red dots) rescued with either  $\gamma$ -actin (pink dots, top panels,  $\gamma$ -actin-KO: n=89,  $\gamma$ -actin-KO+ $\gamma$ -actin: n=85), or GFP (green dots, bottom panels,  $\gamma$ -actin-KO: n=82,  $\gamma$ -actin-KO+GFP: n=74) from 3 independent experiments.

(c) IB analysis of protein level of NM2A in lysates of WT MDCK, mCCD and Eph4 from 3 independent experiments.

(d-e) IB analysis (d) and relative densitometric quantifications (e) of protein levels of NM2A in lysates of WT MDCK, mCCD and Eph4 treated with siControl (blue dots) or si $\gamma$ -actin (red dots) from 4 independent experiments.

(f-h) IF microscopy analysis and RFI quantifications of NM2A (red) at junctions in WT (blue dots) MDCK (siControl: n=98, si $\gamma$ -actin: n=95) (f), mCCD (siControl: n=86, si $\gamma$ -actin: n=97) (g) or Eph4 (siControl: n=105, si $\gamma$ -actin: n=97) (h) upon  $\gamma$ -actin depletion (red dots) from 2-3 independent experiments.

(i-j) IB analysis and relative densitometric quantifications of protein level of NM2A (i) or NM2B (j) in lysates of WT or  $\gamma$ -actin-KO treated with siControl, siNM2A or siNM2B from 3 independent experiments.

(c-e, i-j)  $\beta$ -tubulin was used as a loading control. Dots shows replicates and bars represent mean  $\pm$  SD. Indicated p-values are obtained from a two-sided one-way Anova test.

(k-l) IF microscopy analysis and RFI quantifications of  $\beta$ -actin (red) at junctions in WT (blue dots) mCCD (siControl: n=55, siNM2A: n=60) (k) or Eph4 (siControl: n=88, siNM2A: n=82) (l) upon NM2A depletion (purple dots) from 3 independent experiments.

(b, f-h, k-l) Arrows indicate normal junctional NM2A/ $\beta$ -actin localization. Double-arrows indicate junctional NM2A enrichment. Arrowheads indicate decreased labelling for  $\gamma$ -actin/NM2A/ $\beta$ -actin in KO/KD cells. PLEKHA6 or PLEKHA7 are used as junctional markers (cyan). Scale bar = 20  $\mu$ m. Dots shows replicates, bars represent mean  $\pm$  SD. Indicated p-values are obtained from a two-sided unpaired Mann-Whitney test. Source data for this figure are provided as a Source Data file.

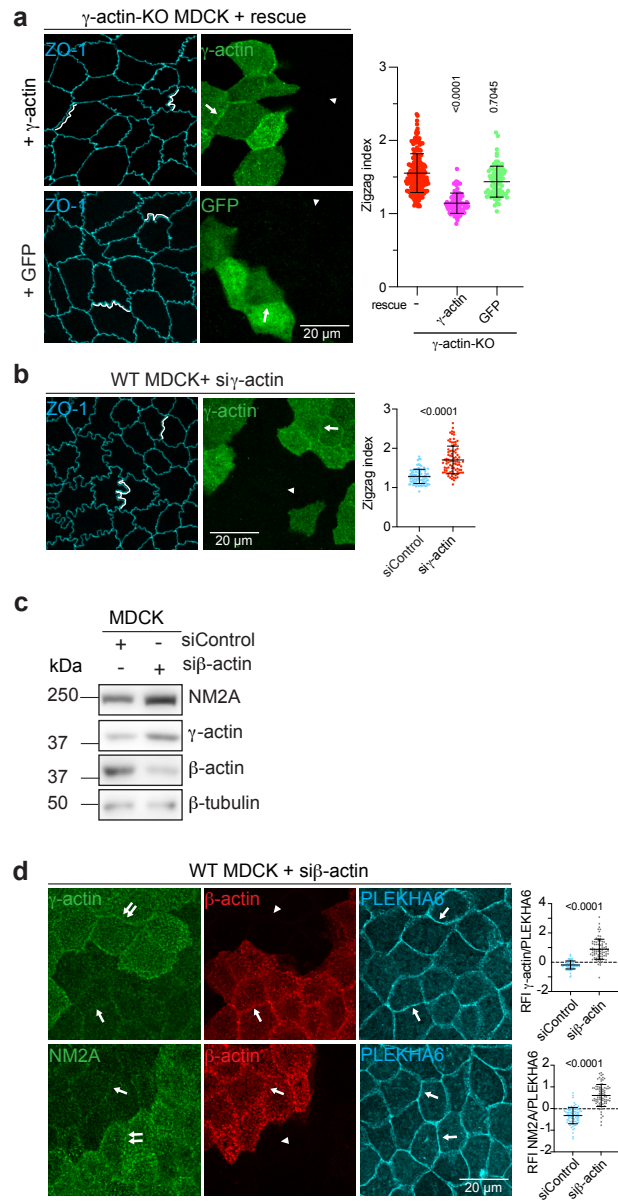



**Supplementary Figure 4. The KD of  $\gamma$ -actin results in increased TJ membrane tortuosity and is rescued by exogenous expression of  $\gamma$ -actin.**

(a) IF microscopy analysis and zigzag index quantifications of ZO-1 (cyan); used as a TJ marker; in  $\gamma$ -actin-KO cells (red dots, n=92) rescued with either  $\gamma$ -actin, (pink dots, top panels, n=87), or by GFP (green dots, bottom panels, n=78) distinguished via  $\gamma$ -actin or GFP (green), from 3 independent experiments.

(b) IF microscopy analysis and zigzag index quantifications of ZO-1 (cyan) in WT (blue dots) MDCK cells upon  $\gamma$ -actin depletion (red dots) (siControl and si $\gamma$ -actin: n=90), distinguished via  $\gamma$ -actin (green), from 3 independent experiments.

(a-b) White line represents the membrane tortuosity. Scale bar = 20  $\mu$ m. Dots shows replicates and bars represent mean  $\pm$  SD. Indicated p-values are obtained from a two-sided unpaired Mann-Whitney test.

(c) IB analysis of protein level of NM2A,  $\gamma$ -actin and  $\beta$ -actin in lysates of WT MDCK treated with siControl or si $\beta$ -actin.  $\beta$ -tubulin was used as a loading control from 3 independent experiments. Dots shows replicates and bars represent mean  $\pm$  SD. Indicated p-values are obtained from a two-sided one-way Anova test.

(d) IF microscopy analysis and RFI quantifications of  $\gamma$ -actin (top panel, siControl: n=86, si $\beta$ -actin: n=78) or NM2A (bottom panel, siControl: n=82, si $\beta$ -actin: n=84) (green) at junctions in WT MDCK cells (blue dots) upon  $\beta$ -actin depletion (grey dots), distinguished via  $\beta$ -actin (red), from 3 independent experiments. Arrows indicate normal junctional  $\gamma$ -actin and NM2A localization. Double-arrows indicate junctional  $\gamma$ -actin and NM2A enrichment. PLEKHA6 was used as a junctional marker (cyan). Scale bar = 20  $\mu$ m. Dots shows replicates and bars represent mean  $\pm$  SD. Indicated p-values are obtained from a two-sided unpaired Mann-Whitney test. Source data for this figure are provided as a Source Data file.

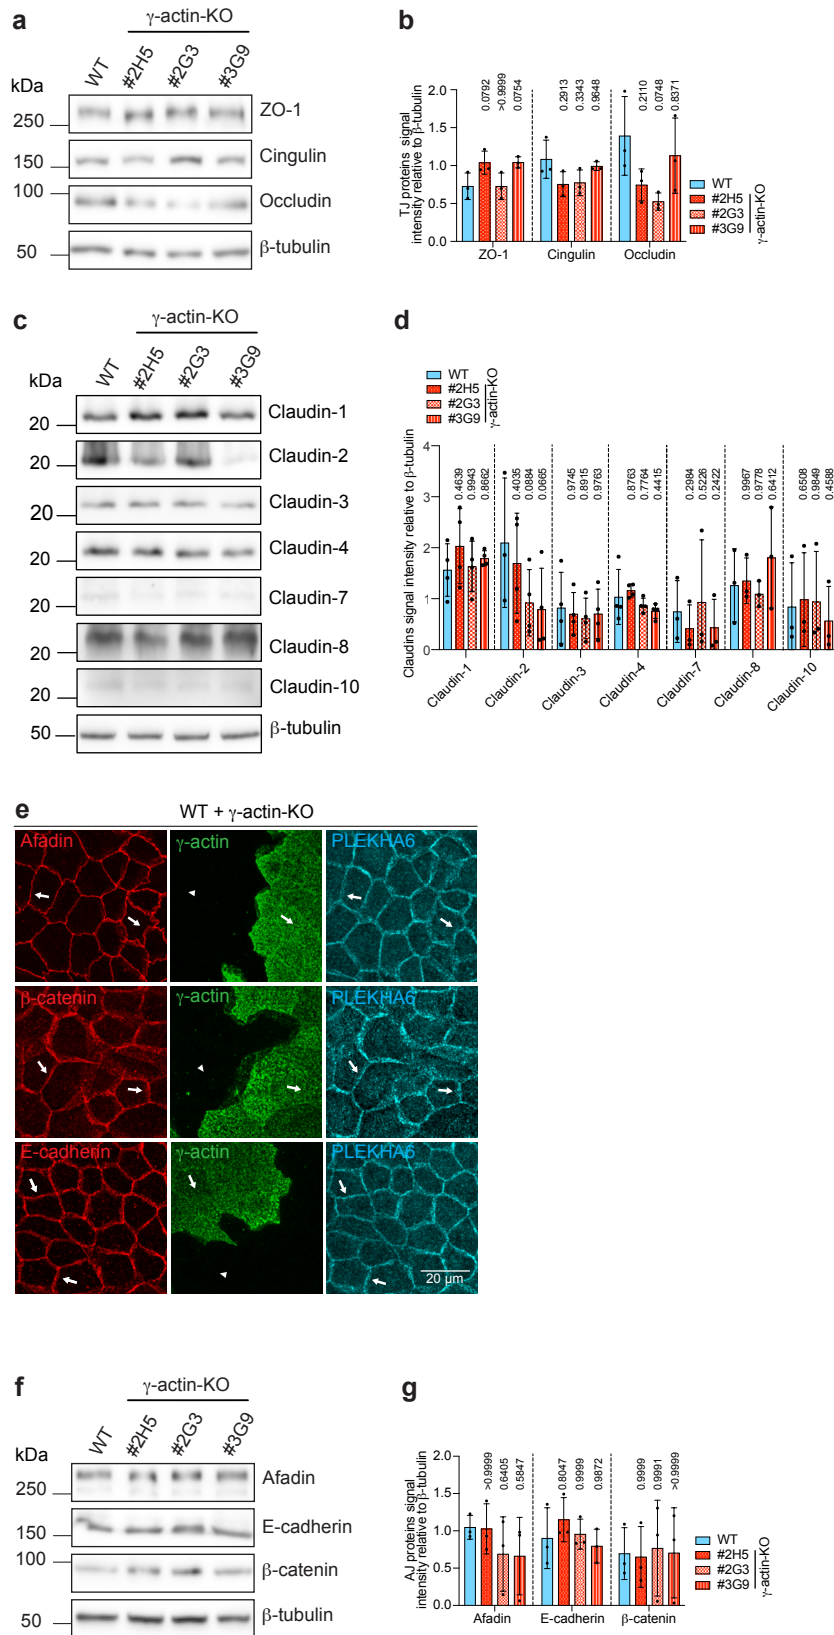

**Supplementary Figure 5. The KO of  $\gamma$ -actin does not perturb the expression of TJ, AJ and claudin proteins, and the junctional accumulation of AJ proteins in MDCK cells.**

(a-d) IB analysis (a, c) and relative densitometric quantifications (b, d) of protein level of either TJ (ZO-1, cingulin and occludin, not changed) (a-b), or claudin (claudin-1, -2, -3, -4, -7, -8, -10, not changed) (c-d) proteins in lysates of WT (blue dots) and  $\gamma$ -actin-KO (red dots, 3 distinct clonal lines) MDCK cells from 3-4 independent experiments.

(e) IF microscopy analysis of endogenous afadin, E-cadherin and  $\beta$ -catenin (AJ proteins, red, not changed) in mixed cultures of WT (blue dots) and  $\gamma$ -actin-KO (red dots) cells, distinguished via  $\gamma$ -actin (green), from 2-3 independent experiments. PLEKHA6 (cyan) is used as a junctional marker. Scale bar = 20  $\mu$ m.

(f-g) IB analysis (f) and relative densitometric quantifications (g) of protein level of afadin, E-cadherin and  $\beta$ -catenin (not changed) in lysates of WT (blue dots) and  $\gamma$ -actin-KO (red dots, 3 distinct clonal lines) MDCK cells from 3 independent experiments.

(a-d, f-g)  $\beta$ -tubulin was used as a loading control. Dots shows replicates and bars represent mean  $\pm$  SD. Indicated p-values are obtained from a two-sided one-way Anova test. Source data for this figure are provided as a Source Data file.

**Supplementary Table 1. Resources table**

| Reagent of resources                                  | Source / Reference                                        | Identifier                          |
|-------------------------------------------------------|-----------------------------------------------------------|-------------------------------------|
| <b>Antibodies</b>                                     |                                                           |                                     |
| Mouse IgG2b monoclonal anti- $\gamma$ -actin (IB, IF) | Prof. C. Chaponnier,<br>University of Geneva <sup>1</sup> | 2A368E2<br>RRID:AB_2571583          |
| Mouse IgG1 monoclonal anti- $\beta$ -actin (IB, IF)   | Prof. C. Chaponnier,<br>University of Geneva <sup>1</sup> | 4C259H12<br>RRID:AB_2571580         |
| Rat polyclonal anti-PLEKHA6 (IF)                      | <sup>2</sup>                                              | RtSZR127                            |
| Guinea pig polyclonal anti-PLEKHA7 (IF)               | <sup>2</sup>                                              | GP2737                              |
| Rabbit polyclonal anti-NM2A (IB, IF)                  | Biolegend                                                 | Cat# 909801<br>RRID:AB_291638       |
| Rabbit polyclonal anti-NM2B (IB, IF)                  | Biolegend                                                 | Cat# 909901<br>RRID:AB_291639       |
| Mouse monoclonal anti-pan-actin (IB)                  | Sigma-Aldrich/Merck                                       | Cat# mab1501<br>RRID: AB_2223041    |
| FITC-phalloidin (IF)                                  | Sigma                                                     | Cat# P5282                          |
| Alexa Fluor™ 488 Phalloidin                           | Invitrogen™                                               | Cat# A12379                         |
| Mouse monoclonal anti-GFP (IF)                        | Roche                                                     | Cat# 11814460001,<br>RRID:AB_390913 |
| Mouse monoclonal anti- $\beta$ -tubulin (IB)          | Thermo Scientific                                         | Cat# 32-2600<br>RRID: AB_2533072    |
| Rat monoclonal anti-ZO-1 (IF)                         | Prof. Daniel Goodenough,<br>Harvard Medical School        | R40.76,<br>RRID:AB_2205518          |
| Mouse monoclonal anti-ZO-1 (IB)                       | Thermo Scientific                                         | Cat# 3391000<br>RRID: AB_2533147    |
| Rabbit polyclonal anti-cingulin (IB, IF)              | Citilab                                                   | C532                                |
| Rabbit polyclonal anti- $\beta$ -catenin (IB, IF)     | Sigma-Aldrich/Merck                                       | Cat# C2206<br>RRID: AB_326078       |
| Rabbit polyclonal anti-E-cadherin                     | Santa Cruz                                                | Cat# 7870<br>RRID: AB_2076666       |
| Mouse monoclonal anti-E-cadherin                      | BD Biosciences                                            | Cat# BD 610181<br>RRID:AB_397580    |
| Rabbit polyclonal anti-Claudin-1 (IB)                 | Thermo Scientific                                         | Cat# 51-9000<br>RRID: AB_2533916    |
| Mouse monoclonal anti-Claudin-2 (IB)                  | Thermo Scientific                                         | Cat# 32-5600<br>RRID: AB_2533085    |
| Rabbit polyclonal anti-Claudin-3 (IB)                 | Thermo Scientific                                         | Cat# 34-1700<br>RRID: AB_2533158    |
| Mouse monoclonal anti-Claudin-4 (IB)                  | Thermo Scientific                                         | Cat# 32-9400                        |

|                                                                  |                    |                                      |
|------------------------------------------------------------------|--------------------|--------------------------------------|
|                                                                  |                    | RRID: AB_2533096                     |
| Rabbit polyclonal anti-Claudin-7 (IB)                            | Thermo Scientific  | Cat# 34-9100<br>RRID: AB_2533190     |
| Rabbit polyclonal anti-Claudin-8 (IB)                            | Thermo Scientific  | Cat# 40-0700Z<br>RRID: AB_2533445    |
| Rabbit polyclonal anti-Claudin-10 (IB)                           | Thermo Scientific  | Cat# 38-8400<br>RRID: AB_2533386     |
| Cy3-AffiniPure Donkey anti-Mouse IgG                             | Jackson Laboratory | Cat# 715-165-151<br>RRID: AB_2315777 |
| Cy3-AffiniPure Donkey anti-Rat IgG                               | Jackson Laboratory | Cat# 712-166-150<br>RRID: AB_2340668 |
| Alexa Fluor 488-AffiniPure Donkey anti-Rabbit IgG                | Jackson Laboratory | Cat# 711-545-152<br>RRID: AB_2313584 |
| Cy5-AffiniPure Donkey anti-Rat IgG                               | Jackson Laboratory | Cat# 712-175-153<br>RRID: AB_2340672 |
| Cy5-AffiniPure Donkey anti-Mouse IgG                             | Jackson Laboratory | Cat# 715-175-150<br>RRID: AB_2340819 |
| Anti-mouse IgG (H+L), HRP Conjugate                              | Promega            | Cat# W4021<br>RRID: AB_430834        |
| Anti-rabbit IgG (H+L), HRP Conjugate                             | Promega            | Cat# W4011<br>RRID: AB_430833        |
| <b>Plasmids</b>                                                  |                    |                                      |
| pTRE2Hyg-GFP-myc                                                 | 3                  | S1210                                |
| pTRE2Hyg-GFP-cingulin-FL-myc                                     | 4                  | S1052                                |
| pTRE2Hyg-GFP-ZO-1-FL                                             | 5                  | S2474                                |
| pTRE2Hyg-ACTG1-FL                                                | This paper         | S2882                                |
| pTRE2Hyg-ACTB-FL                                                 | This paper         | S2926                                |
| <b>Chemicals, Reagents, Peptides, Critical commercial assays</b> |                    |                                      |
| Pierce Protease Inhibitor Tablet, EDTA-free                      | Thermo Scientific  | Cat# A32965                          |
| jetOPTIMUS                                                       | Polyplus           | Cat# 117-15                          |
| Lipofectamine RNAiMAX                                            | Invitrogen         | Cat# 13778030                        |
| Hanks buffer                                                     | Gibco              | Cat# 14025-050                       |
| 3 kDa fluorescein-dextran                                        | Invitrogen         | Cat# D3305                           |
| OptiMeM                                                          | Gibco              | Cat# 51985-026                       |
| DMEM without phenol red                                          | Gibco              | Cat# 21063-029                       |
| NucleoSpin® RNA kit                                              | Macherey-Nagel     | Cat# 740955.50                       |
| iScript™ cDNA Synthesis kit                                      | Bio-Rad            | Cat# 1708890                         |
| Master Mix Select SYBR™ kit                                      | Thermo Scientific  | Cat# 4472908                         |
| Pierce BCA Protein assay kit                                     | Thermo Scientific  | Cat# 23225                           |

|                                                                          |                                                         |                  |
|--------------------------------------------------------------------------|---------------------------------------------------------|------------------|
| WesternBright ECL kit                                                    | Advansta                                                | Cat# K-12045-D50 |
| Molecular Weight Markers for SDS-PAGE                                    | BioRad                                                  | Cat# 1610373     |
| DNeasy Blood and Tissue kit                                              | Qiagen                                                  | Cat# 69504       |
| Hoechst                                                                  | Thermo Scientific                                       | Cat# 33342       |
| Blebbistatin                                                             | Sigma-Aldrich/Merck                                     | Cat# B0560       |
| Bovines Serumalbumin (BSA)                                               | Carl Roth GmbH                                          | Cat# 3737.1      |
| Dulbecco's Phosphate Buffered Saline (PBS)                               | Gibco™                                                  | Cat# 21600-051   |
| Glass coverslips 1.5H 22 x 22 mm                                         | Carl Roth GmbH                                          | Cat# KCY1.1      |
| Microscope slides, corners grounded 90°, without frosted edge            | Carl Roth GmbH                                          | Cat# H869.1      |
| Mowiol® 4-88                                                             | Carl Roth GmbH                                          | Cat# 0713.2      |
| Paraformaldehyde (PFA)                                                   | Science Services                                        | Cat# E15714      |
| Poly-D-Lysine Hydrobromide                                               | Sigma-Aldrich                                           | Cat# P7405-5MG   |
| 6-well tissue culture plate, flat bottom, polystyrene                    | TPP Techno Plastic Products AG                          | Cat# 92406       |
| <b>Experimental models: Cell lines</b>                                   |                                                         |                  |
| Madin-Darby Canine Kidney Tet-Off (MDCK) WT                              | A. Fanning, University of North Carolina                | Clontech         |
| Madin-Darby Canine Kidney Tet-Off (MDCK) $\gamma$ -actin-KO              | This paper                                              | N/A              |
| Mouse mammary epithelial cell line (Eph4) WT                             | Reichmann Laboratory, <sup>6</sup>                      | N/A              |
| Mouse Cortical Collecting Duct Cell Line (mCCD) WT                       | Férraille Laboratory, University of Geneva <sup>7</sup> | N/A              |
| <b>Oligonucleotides</b>                                                  |                                                         |                  |
| siRNA targeting sequence : canis $\gamma$ -actin<br>GUUAACUGUCCCUUGGUAUA | This paper                                              | Microsynth       |
| siRNA targeting sequence : canis $\beta$ -actin<br>AAACCUAACUUGCGCAGAA   | This paper                                              | Microsynth       |
| siRNA targeting sequence : canis NM2A<br>GAAGAUCACAGACGUCAUUAU           | This paper                                              | Microsynth       |
| siRNA targeting sequence : canis NM2B<br>GCUACUAUUCGGGAUUGAUCU           | This paper                                              | Microsynth       |
| siRNA negative control:<br>CGUACGCGGAUACUUCGA                            | This paper                                              | Microsynth       |
| CRISPR target sequence: canis <i>ACTG1</i><br>TCTACGAGGGGTACGCCTTG       | This paper                                              | Genscript        |
| CRISPR target sequence: canis <i>ACTG1</i><br>GAAGCTCTGCTACGTCGCCC       | This paper                                              | Genscript        |

|                                                                                                    |            |                                                                                                                                           |
|----------------------------------------------------------------------------------------------------|------------|-------------------------------------------------------------------------------------------------------------------------------------------|
| RT-qPCR target sequence: canis <i>ACTB</i><br>Fw: AGCGCAAGTACTCTGTGTGG<br>Rv: GTAACAGTCCGCCTAGAAGC | This paper | Microsynth                                                                                                                                |
| RT-qPCR target sequence: canis <i>MYH9</i><br>Fw: CTGCAAAGTGGCCAAGGAGA<br>Rv: GTCGGTGATCATCGCCTCAT | This paper | Microsynth                                                                                                                                |
| RT-qPCR target sequence: canis <i>HPRT</i><br>Fw: TGGACAGGACTGAGCGGC<br>Rv: TGAGCACACAGAGGGCTACG   | This paper | Microsynth                                                                                                                                |
| <b>Software and algorithms</b>                                                                     |            |                                                                                                                                           |
| Image J                                                                                            | N/A        | Imagej.nih.gov/ij/<br>RRID: SCR_003070                                                                                                    |
| Affinity Designer                                                                                  | N/A        | <a href="https://affinity.serif.com/">https://affinity.serif.com/</a><br>RRID: SCR_016952                                                 |
| Prism GraphPad                                                                                     | N/A        | <a href="https://www.graphpad.com/scientific-software/prism/">https://www.graphpad.com/scientific-software/prism/</a><br>RRID: SCR_002798 |
| Snapgene Version 3.1.2                                                                             | N/A        | snapgene.com<br>RRID:SCR_015052                                                                                                           |

#### References for Supplementary Table 1

1. Dugina V, Zwaenepoel I, Gabbiani G, Clement S, Chaponnier C. Beta and gamma-cytoplasmic actins display distinct distribution and functional diversity. *J Cell Sci* **122**, 2980-2988 (2009).
2. Sluysmans S, *et al.* PLEKHA5, PLEKHA6 and PLEKHA7 bind to PDZD11 to target the Menkes ATPase ATP7A to the cell periphery and regulate copper homeostasis. *Mol Biol Cell* **32**, 1-20 (2021).
3. Zheng CY, Petralia RS, Wang YX, Kachar B. Fluorescence recovery after photobleaching (FRAP) of fluorescence tagged proteins in dendritic spines of cultured hippocampal neurons. *J Vis Exp*, (2011).
4. D'Atri F, Citi S. Cingulin interacts with F-actin in vitro. *FEBS Lett* **507**, 21-24 (2001).
5. Mauperin M, Sassi A, Mean I, Feraille E, Citi S. Knock Out of CGN and CGNL1 in MDCK Cells Affects Claudin-2 but Has a Minor Impact on Tight Junction Barrier Function. *Cells* **12**, (2023).
6. Fialka I, Schwarz H, Reichmann E, Oft M, Busslinger M, Beug H. The estrogen-dependent c-JunER protein causes a reversible loss of mammary epithelial cell polarity involving a destabilization of adherens junctions. *J Cell Biol* **132**, 1115-1132 (1996).
7. Wang YB, *et al.* Sodium transport is modulated by p38 kinase-dependent cross-talk between ENaC and Na,K-ATPase in collecting duct principal cells. *J Am Soc Nephrol* **25**, 250-259 (2014).

## **Supplementary notes**

### **Abbreviations**

AJC, apical junctional complex; KO, knock-out; FRAP, fluorescence recovery after photobleaching; TJ, tight junction; AJ, adherens junction; NM2, non-muscle myosin-2; KD, knock-down; IB, immunoblot; IF, immunofluorescence; pMLC2, phosphorylated myosin light chain 2; TER, transepithelial resistance; AFM, atomic force microscopy; FSC-A, forward scatter area; MLCK, myosin light chain kinase; ABR, actin binding region; Madin-Darby Canine Kidney-II, MDCK; mCCD, mouse cortical collecting duct; EpH4, mouse mammary; DMEM, Dulbecco's Modified Eagle's; FBS, Fetal Bovine Serum; NEAA, non-essential amino-acids; P/S, penicillin and streptomycin; gRNA, guide RNA; GFP, green fluorescent protein; RT, room temperature; NaCl, sodium chloride; RIPA, radioimmunoprecipitation assay buffer; EDTA, ethylenediaminetetraacetic acid; SDS, sodium dodecyl sulfate; O<sub>2</sub>, oxygen; CO<sub>2</sub>, carbon dioxide; FC, fold change; FDR, false discovery rate; PIC, protease inhibitor cocktail; PFA, paraformaldehyde; BSA, bovine serum albumin; DAPI, 4',6 diamidino 2 phenylindole; FL, full-length; HBSS, Hank's balanced salt solution; GLM, general linear model; hr, hour; s, seconds; Perm<sub>app</sub>, apparent permeability; PBS, phosphate buffered saline; DPBS, Dulbecco's phosphate buffered saline; S-MEM, suspension-minimum essential medium; EGF, epidermal growth factor; PLEKHA6, Pleckstrin Homology Domain-Containing, family A member 6; kDa, kilodaltons; ECL, enhanced chemiluminescence; SD, standard deviation; Px, pixels; RFI, relative fluorescence intensity; ns, not significant; WT, wild-type.
