# Supplementary material for: A feedback circuitry involving γ-actin, β-actin and nonmuscle myosin-2 A controls tight junction and apical cortex mechanics
Source: Springer Nature journal article supplement (doi:10.1038/s41467-025-57428-y), 2025-03-13
Supplement: MOESM2 [file 41467_2025_57428_MOESM2_ESM.pdf › 41467_2025_57428_MOESM2_ESM.pdf]

## **Description of Additional Supplementary Files**

File Name: Supplementary Movie 1

Description: FRAP of cingulin in WT cells.

File Name: Supplementary Movie 2

Description: FRAP of cingulin in  $\gamma$ -actin-KO cells.

File Name: Supplementary Movie 3

Description: FRAP of ZO-1 in WT cells.

File Name: Supplementary Movie 4

Description: FRAP of ZO-1 in  $\gamma$ -actin-KO cells.

File Name: Supplementary Movie 5

Description: FRAP of ZO-1 in  $\gamma$ -actin-KO cells treated with DMSO.

File Name: Supplementary Movie 6

Description: FRAP of ZO-1 in  $\gamma$ -actin-KO cells treated with blebbistatin.
